# Supplementary material for: The Role of Non-Coding RNAs in Cytoplasmic Male Sterility in Flowering Plants
Source: Int J Mol Sci. 2017 Nov 16;18(11):2429. doi: 10.3390/ijms18112429 (PMC5713397; doi:10.3390/ijms18112429)
Supplement: Supplementary file 1 [file ijms-18-02429-s001.xlsx]

## Sheet: Sheet1
Supplementary Table 1	Detailed description of selected differentially expressed miRNAs					Notes	NA - not available
							Only one possible target is shown
							When fold change value is negative, miRNA is downregulated in CMS line
	miRNA	Sequence	Accession	Database	Fold change	Target	Target Annotation
					log2	Accession
Maize CMS C48-2					CMS/fertile
Shen et al. 2011	Zma-miR397c	uugagcgcagcguugaugagc	BZ820237.1	NCBI GSS	< 0	GRMZM2G072808	Laccase
[61]	Zma-miR601	cgcauauauagauguauuuuaac	AC214351.2	MAGI v3.1	< 0	GRMZM2G091819	Flavin-containing monooxygenase (FMO)
	Zma-miR604	ucuguguuccgcgauguugca	AC192168.2	MAGI v3.1	> 0	GRMZM2G141034	monosaccharide transport protein 2 (STP2)
Brassica juncea hybrid
Yang et al. 2013	miR156a	ugcucacugcucuuucugucaga	MIMAT0017397	miRbase	< 0	AT1G27360.1	SQUAMOSA PROMOTER-LIKE 11
[57]	miR167a	ugaagcugccagcaugaucua	MIMAT0000196	miRbase	< 0	AT5G37020.1	AUXIN RESPONSE FACTOR ARF8
	miR319a	uuggacugaagggagcucccu	MIMAT0000511	miRbase	> 0	AT1G30210.1	TCP24; TEOSINTE BRANCHED 1
	miR395a	cugaaguguuugggggaacuc	MIMAT0000938	miRbase	< 0	AT3G22890.1	ATP SULPHURYLASE (APS)
Rice MeixiangA
Yan et al. 2015	osa-miR528-3p	ccugugcuugccucuuccauu	MIMAT0022926	miRbase	1.23	LOC_Os06g06050.1	OsFBL27 - F-box domain and LRR containing protein
[42]	osa-miR1432-5p	aucaggagagaugacaccgac	MIMAT0005966	miRbase	2.5	LOC_Os05g07210.1	metal cation transporter
	osa-miR2118c	uucccgaugccuccuauuccua	MIMAT0011742	miRbase	-1.05	LOC_Os01g20720.1	CC-NBS-LRR
Brassica oleracea Bo01-12A
Song et al. 2015	bol-miR157a bol-miR171a bol-miR172 bol-miR395	uugacagaagauagagagcac	MIMAT0010169	miRbase	NA	TC359888	SPL transcription factors
[40]	bol-miR171a	uugagccgugccaauaucacg	MIMAT0010170	miRbase	NA	TC361978	SCARECROW-like (SCL) trancription factor
	bol-miR172	agaaucuugaugaugcugcau	MIMAT0010171	miRbase	NA	TC393465	APETALA2 (AP2) transcription factor
	bol-miR824	uagaccauuugugagaaggga	MIMAT0005597	miRbase	NA	TC379257	MADS-box trancription factor-like protein
						Note: acc. numbers from psRNATarget database
Brassica rapa CMS-Ogura
Wei et al. 2015	bra-mir157a	uugacagaagauagagagcac	MIMAT0010152	miRbase	-1.05	Bra016891	SPL9; SPL9 (SQUAMOSA PROMOTER BINDING PROTEIN-LIKE 9); transcription factor
[59]	bra-miR158-3p	uuuccaaauguagacaaagca	MIMAT0035702	miRbase	-2.63	Bra027656	; glutathione S-transferase;Pentatricopeptide repeat-containing protein; B8XWY7_BRANA Restorer-of-fertility (Fragment)
	bra-miR159a	uuuggauugaagggagcucua	MIMAT0010153	miRbase	< 0	Bra000531	AtMYB81 (myb domain protein 81)
	bra-miR164a	uggagaagcagggcacgugca	MIMAT0010156	miRbase	< 0	Bra001586	CUP-SHAPED COTYLEDON 1 [Raphanus sativus]
	bra-miR172a	agaaucuugaugaugcugcau	MIMAT0010166	miRbase	-0.95	Bra011741	AP2, FLO2, FL1; AP2 (APETALA 2); transcription factor
	bra-miR5712	aauauuaauauaauuggugag	MIMAT0023009	miRbase	< 0	Bra035074	VHA-A; VHA-A (VACUOLAR ATP SYNTHASE SUBUNIT A); ATP binding / hydrogen ion transporting ATP synthase, rotational mechanism / hydrolase, acting on acid anhydrides, catalyzing transmembrane movement of substances / proton-transporting ATPase, rotational mechanism"
	bra-miR5716	uuggauaauugaagauauaaa	MIMAT0023013	miRbase	-1.33	Bra029631	zinc finger (C3HC4-type RING finger) family protein;RPM1-interacting protein 4 (RIN4) family protein
	bra-miR6030	uccacccauaccauacagaccc	MIMAT0023650	miRbase	1.43	Bra036045	disease resistance protein (CC-NBS-LRR class), putative
Glycine max NJCMS1A
Ding et al. 2016	gma-miR166a-3p	ucggaccaggcuucauucccc	MIMAT0001677	miRbase	0	Glyma04g09000.2	homeobox-leucine zipper protein
[60]	gma-miR169b	cagccaaggaugacuugccga	MIMAT0007356	miRbase	-1	Glyma17g05920.1	Nuclear transcription factor Y subunit A3
	gma-miR171a	ugagccgugccaauaucacga	MIMAT0007358	miRbase	< 0	Glyma01g18040.1	scarecrow-like protein 27-like [Glycine max]
	gma-miR394b-5p	uuggcauucuguccaccucc	MIMAT0022973	miRbase	-2	Glyma05g28050.2	F-box only protein 6-like [Glycine max]
	gma-miR395c	cugaaguguuugggggaacuc	MIMAT0021626	miRbase	0	Glyma18g36276.1	sulfate transporter 2.1-like [Glycine max]
	gma-miR396k-5p	uuccacagcuuucuugaacuu	MIMAT0032132	miRbase	> 0	Glyma02g02942.1	Helix-loop-helix DNA-binding domain/ Transcription factor bHLH79
	gma-miR397a	ucauugagugcagcguugaug	MIMAT0021627	miRbase	-2	Glyma03g14450.1	laccase-4-like [Glycine max]
	gma-miR408c-3p	augcacugccucuucccuggc	MIMAT0021632	miRbase	< 0	Glyma05g30380.1	Plastocyanin-like domain
Raphanus sativus CMS-WA
Zhang et al.2016	miR158b-3p	ucccaaauguagacaaagc	NA		4	Rsa#S42049270	PPR-RFL
[43]	miR161	ucaaugcacugaaagugacua	NA		>> 1	CL1282.Contig1	Mechanosensitive channel of small conductance-like 10
	miR395a	cugaaguguuuggggggacuc	NA		10	Unigene14836	Putative F-box/kelch-repeat protein
Pummelo cybrid line
Fang et al. 2016	cga-miR156a.1	cugacagaagagagugagcac	NA		1	Cs7g11770.1	SPL6-like
[58]	cga-miR399a.1	ugccaaaggagauuugcccgg	NA		-3	Cs2g06030.1	UBC E2
	cga-miR827	uuagaugaccaucaacaaaca	NA		0	Cs6g02720.1	bZIP
